# Supplementary material
Source: publisher site journal article supplement (https://www.spandidos-publications.com/6850/downloadSupplementary)
Supplement: Supplementary file 1 [file downloadSupplementary]

## Sheet: STableVII CV-Survival
Table SVII. PSAT1-associated OS and RSF genes are listed with their p-value, CV support and regression coefficient (wi) for EGFR-mutant lung tumors (GSE31210).
EGFR mutant tumor (n=127)		Relapse-free survival			Overall survival
Genes	Probe ID	P-value	% CV Support	Weights (wi)	P-value	% CV Support	Weights (wi)
CFD	205382_s_at	0.0002055	100	-0.114579	0.000463	100	-0.155391
FILIP1L	1554965_at	0.009436	100	-0.015713	0.0188	96.85	-0.019086
GPRC5A	212444_at	0.005962	100	-0.069177	0.00606	100	-0.097158
	235563_at	0.005228	100	-0.08264	0.0323	98.43	-0.113706
	203108_at	0.02229	100	-0.039503	-	-	-
HBEGF	244857_at	0.0002611	100	-0.030123	0.00467	100	-0.038612
MCM2	202107_s_at	5.76e-05	100	0.064114	0.000193	100	0.090761
MMP15	243883_at	-	-	-	0.00507	100	0.029494
PAICS	201013_s_at	6.36e-05	100	0.044286	0.00536	100	0.059939
	201014_s_at	0.001116	100	0.048539	-	-	-
PSAT1	220892_s_at	0.004256	100	0.063036	0.023	98.43	0.088233
	223062_s_at	0.001716	100	0.088942	0.0449	92.91	0.121965
SCEL	1554921_a_at	0.01656	100	-0.070521	0.0297	98.43	-0.107053
	232056_at	0.00511	100	-0.093097	0.0123	100	-0.136887
SFN	209260_at	0.0002136	100	0.054471	0.00539	100	0.073341
	33322_i_at	6.67e-05	100	0.034709	0.00121	100	0.046443
	33323_r_at	0.00139	100	0.040225	0.00723	100	0.053199
SLC39A4	219215_s_at	0.0135	100	0.025303	0.0209	98.43	0.037955
TYMS	1554696_s_at	0.0008194	100	0.060664	0.0137	100	0.083552
	202589_at	0.002288	100	0.086638	0.00762	100	0.119874
UHRF1	225655_at	0.02998	96.85	0.103476	0.01139	100	0.144022
CDCA7	224428_s_at	0.006952	100	0.070623	-	-	-
BTG2	201236_s_at	0.03605	96.06	-0.04939	-	-	-
NETO2	218888_s_at	0.02223	100	0.04869	-	-	-
	222774_s_at	0.04979	42.52	0.065235	-	-	-
JAG1	229924_s_at	0.02418	99.21	-0.024027	-	-	-
ANKRD22	238439_at	0.02015	100	0.044862	-	-	-
CV, cross-validated.
